# Supplementary material
Source: Springer Nature journal article supplement (https://www.springermedizin.de/resource/supplementary/12933_2013_675_MOESM5_ESM.pdf/9539112)

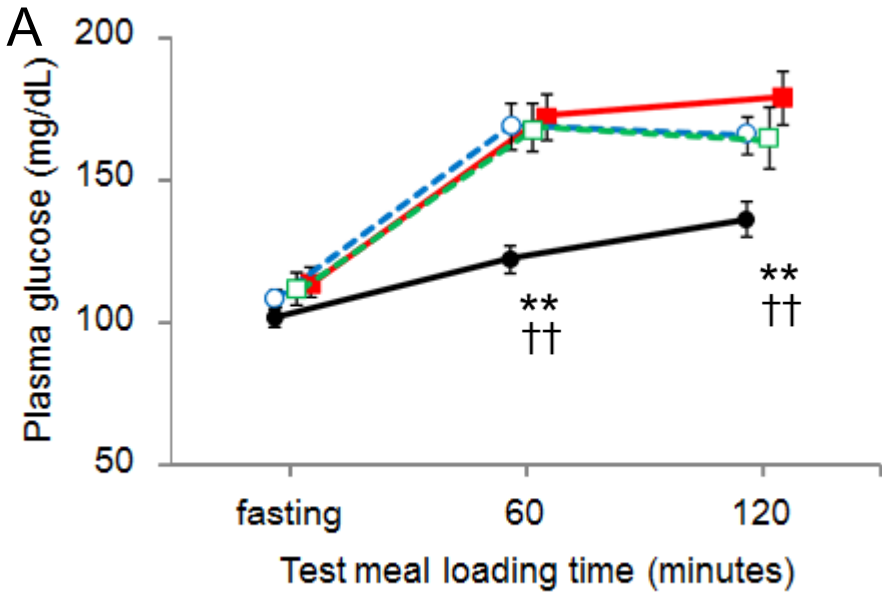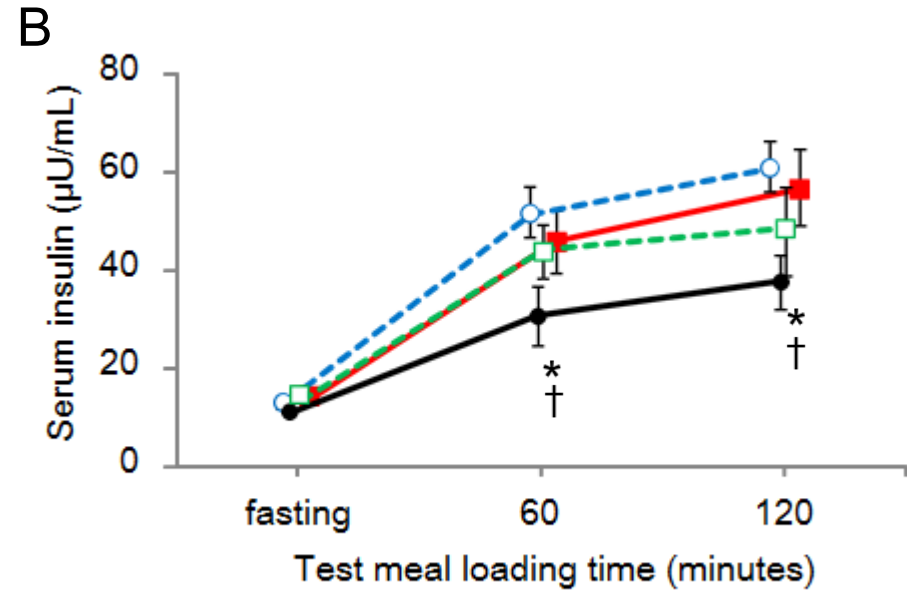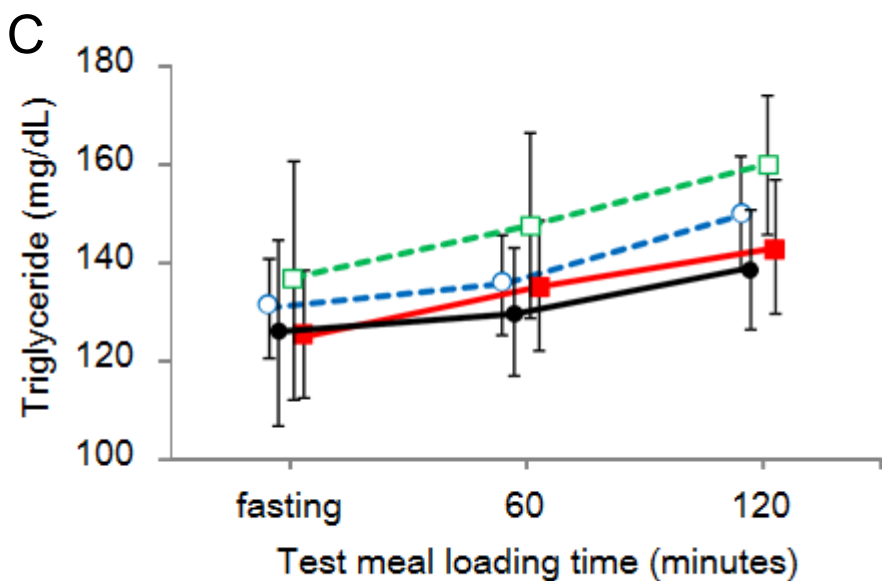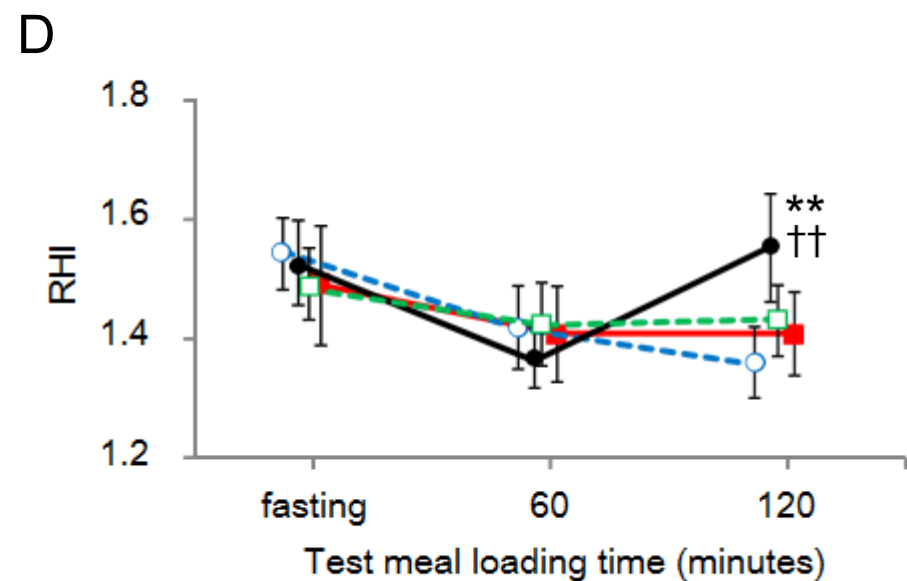

--○-- PPHG-miglitol before   
 --●-- PPHG-miglitol after   
 --□-- PPHG-control before   
 --■-- PPHG-control after

Supplement: MOESM5 [file 9539112]
